# Supplementary material
Source: Research Square preprint supplement (doi:10.21203/rs.3.rs-9890728/v1)
Supplement: Supplementary file 1 [file 1f04ded8cea74e68a2a3cf89.docx]

Supplemental Figures

Figure 1
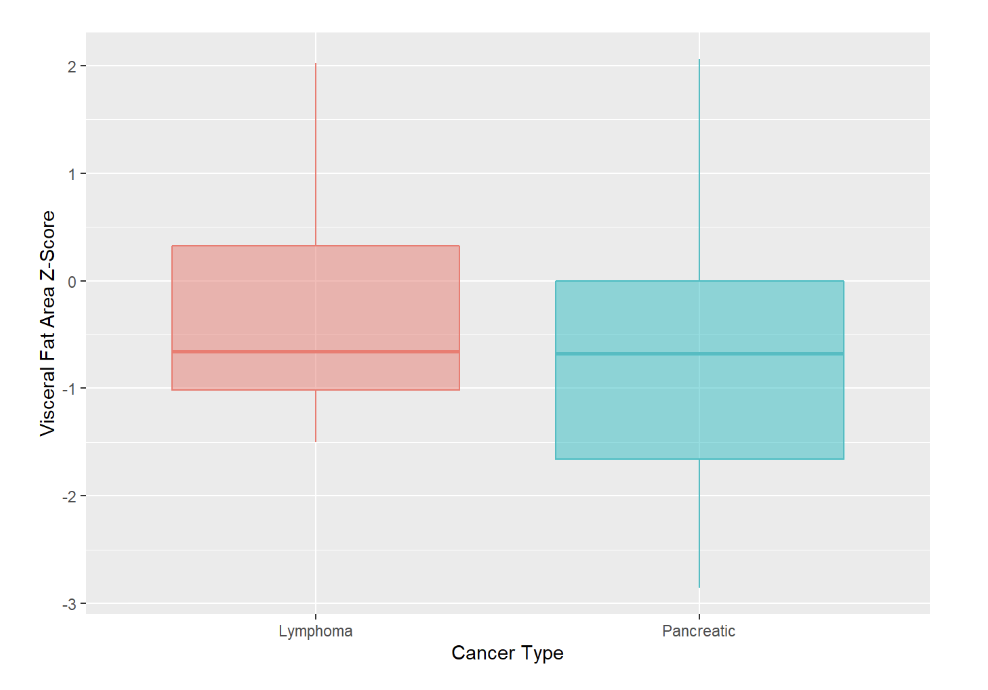


Figure 1: Median Z-scores of Visceral Fat area for lymphoma and pancreatic cancer cases demonstrates substantial overlap for these two cancer subtypes.

Figure 2
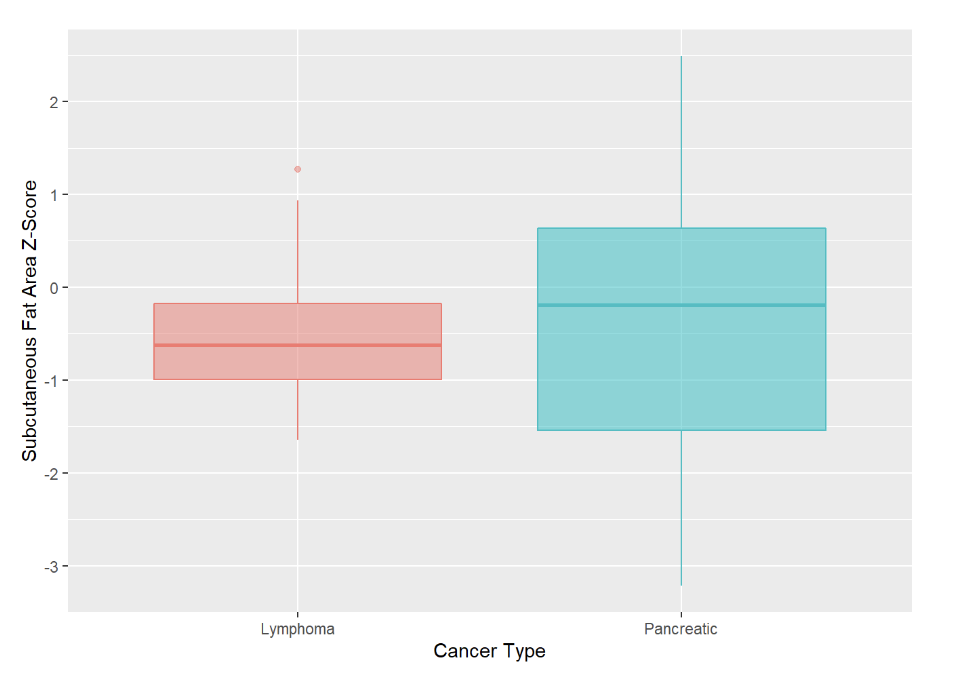


Figure 2: Median Z-scores of Subcutaneous Fat Area for lymphoma and pancreatic cancer cases demonstrates substantial overlap for these two cancer subtypes.

Figure 3


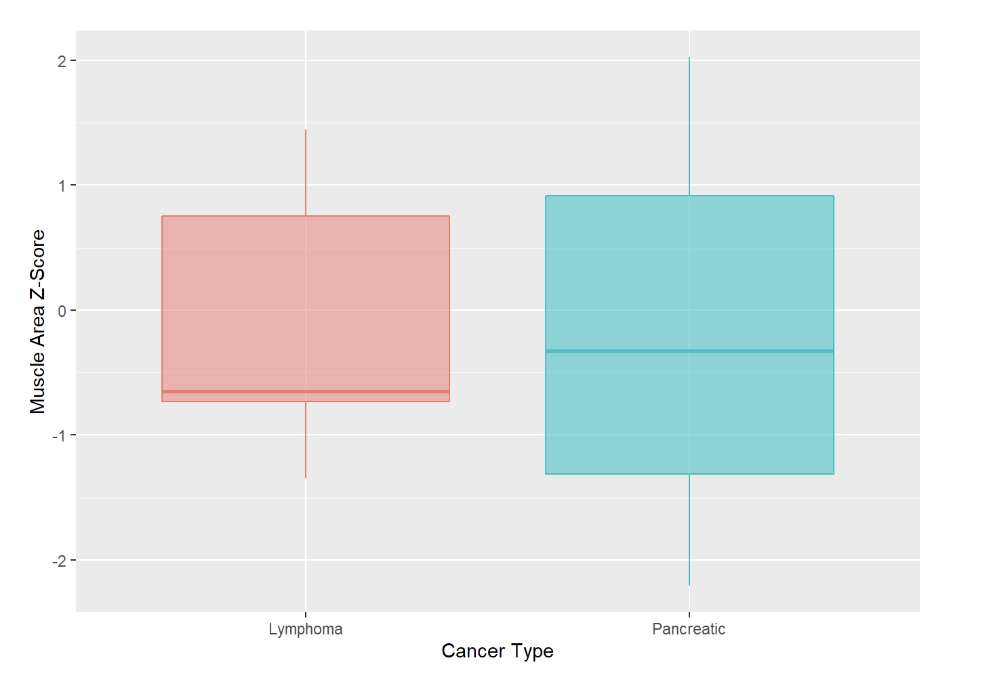


Figure 3: Median Z-scores of Skeletal Muscle Area for lymphoma and pancreatic cancer cases demonstrates substantial overlap for these two cancer subtypes.
